# Supplementary material for: A general mechanism for perceptual decision-making in the human brain
Source: Springer Nature journal article supplement (doi:10.1038/nature02966), 2004-10-01
Supplement: 41586_2004_BFnature02966_MOESM2_ESM.pdf [file 41586_2004_BFnature02966_MOESM2_ESM.pdf]

## **Supplementary Tables**

**Table S1**

| Brain region                      | BA  | Hemi-<br>sphere | Peak MNI coordinates<br>(mm) |     |     | Z value |
|-----------------------------------|-----|-----------------|------------------------------|-----|-----|---------|
|                                   |     |                 | x                            | y   | z   |         |
| Superior Frontal Sulcus           | 8/9 | L               | -24                          | 24  | 36  | 4.20    |
|                                   |     | R               | 36                           | 34  | 40  | 3.81    |
| Superior Frontal Gyrus            | 9   | R               | 14                           | 52  | 38  | 4.58    |
| Medial Frontal Gyrus              | 10  | R               | 10                           | 70  | 4   | 5.50    |
|                                   | 11  | R               | 10                           | 52  | -20 | 4.36    |
| Precentral Gyrus                  | 6   | L               | -18                          | -24 | 72  | 4.98    |
| Posterior Cingulate Cortex        | 31  | R               | 14                           | -46 | 34  | 7.76    |
| Cuneus                            | 18  | R               | 6                            | -96 | 12  | 3.80    |
| Post. Superior Temporal<br>Sulcus | 39  | L               | -54                          | -64 | 16  | 5.77    |
|                                   |     | R               | 46                           | -66 | 24  | 6.11    |
| Superior Temporal Gyrus           | 38  | L               | -36                          | 16  | -44 | 4.33    |
|                                   | 22  | L               | -54                          | -6  | 10  | 4.02    |
|                                   |     | R               | 64                           | 2   | 2   | 3.95    |
| Middle Temporal Gyrus             | 21  | R               | 64                           | -40 | -2  | 4.38    |
| Inferior Temporal Gyrus           | 21  | R               | 56                           | 0   | -36 | 7.25    |
| Parahippocampal Gyrus             | 20  | L               | -28                          | -12 | -20 | 7.57    |
|                                   |     | R               | 26                           | -16 | -22 | 5.55    |

**Table S1. Regions showing a greater response to suprathreshold than to perithreshold stimuli.** Activated anatomical region, approximate Brodmann area (BA), hemisphere, coordinates of the local maxima of significance within the Montreal Neurological Institute (MNI) coordinate system and the peak Z value are given. The reported regions were active with  $p < 0.001$  (uncorrected).

**Table S2**

| Brain region                  | BA   | Hemi-<br>sphere | Peak MNI coordinates<br>(mm) |     |     | Z value |
|-------------------------------|------|-----------------|------------------------------|-----|-----|---------|
|                               |      |                 | x                            | y   | z   |         |
| Superior Frontal Gyrus        | 6    | L               | -20                          | 4   | 60  | 4.64    |
|                               |      | R               | 34                           | -6  | 56  | 3.97    |
|                               | 11   | L               | -24                          | 48  | -22 | 3.55    |
| Middle Frontal Gyrus          | 9/46 | R               | 46                           | 32  | 30  | 4.76    |
| Middle Frontal Gyrus          | 10   | R               | 42                           | 64  | 12  | 4.53    |
| Inferior Frontal Gyrus        | 9    | R               | 42                           | 4   | 30  | 3.79    |
|                               |      | L               | -48                          | 10  | 32  | 3.85    |
| Anterior Insula               | 13   | L               | -34                          | 24  | 4   | 5.99    |
|                               |      | R               | 34                           | 22  | -8  | 4.75    |
| Anterior Cingulate Gyrus      | 32   | L               | -2                           | 28  | 38  | 6.84    |
| Posterior Cingulate<br>Cortex | 23   | R               | 0                            | -28 | 20  | 4.59    |
| Caudate                       |      | L               | -8                           | 6   | 14  | 5.02    |
| Thalamus                      |      | R               | 10                           | -20 | 4   | 3.98    |
|                               |      | R               | 12                           | -2  | 12  | 3.57    |

**Table S2. Regions showing a greater response to perithreshold than to suprathreshold stimuli.** Activated anatomical region, approximate Brodmann area (BA), hemisphere, coordinates of the local maxima of significance within the Montreal Neurological Institute (MNI) coordinate system and the peak Z value are given. The reported regions were active with  $p < 0.001$  (uncorrected).

**Table S3**

| Brain region                      | BA  | Hemi-<br>sphere | Peak MNI coordinates<br>(mm) |     |     | Z<br>value |
|-----------------------------------|-----|-----------------|------------------------------|-----|-----|------------|
|                                   |     |                 | x                            | y   | z   |            |
| Superior Frontal Sulcus           | 8/9 | L               | -22                          | 26  | 36  | 3.66       |
| Lateral Orbital Frontal<br>Cortex | 47  | L               | -28                          | 28  | -20 | 4.47       |
| Precuneus                         | 7   | R               | 16                           | -42 | 58  | 4.32       |
| Superior Temporal Gyrus           | 38  | L               | -40                          | 18  | -20 | 3.66       |
| Fusiform Gyrus                    | 37  | L               | -42                          | -60 | -30 | 3.87       |
|                                   | 37  | R               | 36                           | -58 | -12 | 5.33       |
| Parahippocampal Gyrus             | 20  | R               | 44                           | -18 | -20 | 4.32       |
| Caudate                           |     | R               | 22                           | -20 | 22  | 4.64       |

**Table S3. Regions showing significant correlation with absolute difference between signals in FACE and HOUSE ( $|FACE(t) - HOUSE(t)|$ ).** Activated anatomical region, approximate Brodmann area (BA), hemisphere, coordinates of the local maxima of significance within the Montreal Neurological Institute (MNI) coordinate system and the peak Z value are given. The reported regions were active with  $p < 0.001$  (uncorrected).
