# Supplementary material for: A general mechanism for perceptual decision-making in the human brain
Source: Springer Nature journal article supplement (doi:10.1038/nature02966), 2004-10-01
Supplement: 41586_2004_BFnature02966_MOESM3_ESM.pdf [file 41586_2004_BFnature02966_MOESM3_ESM.pdf]

## Supplementary Figures

Figure S1

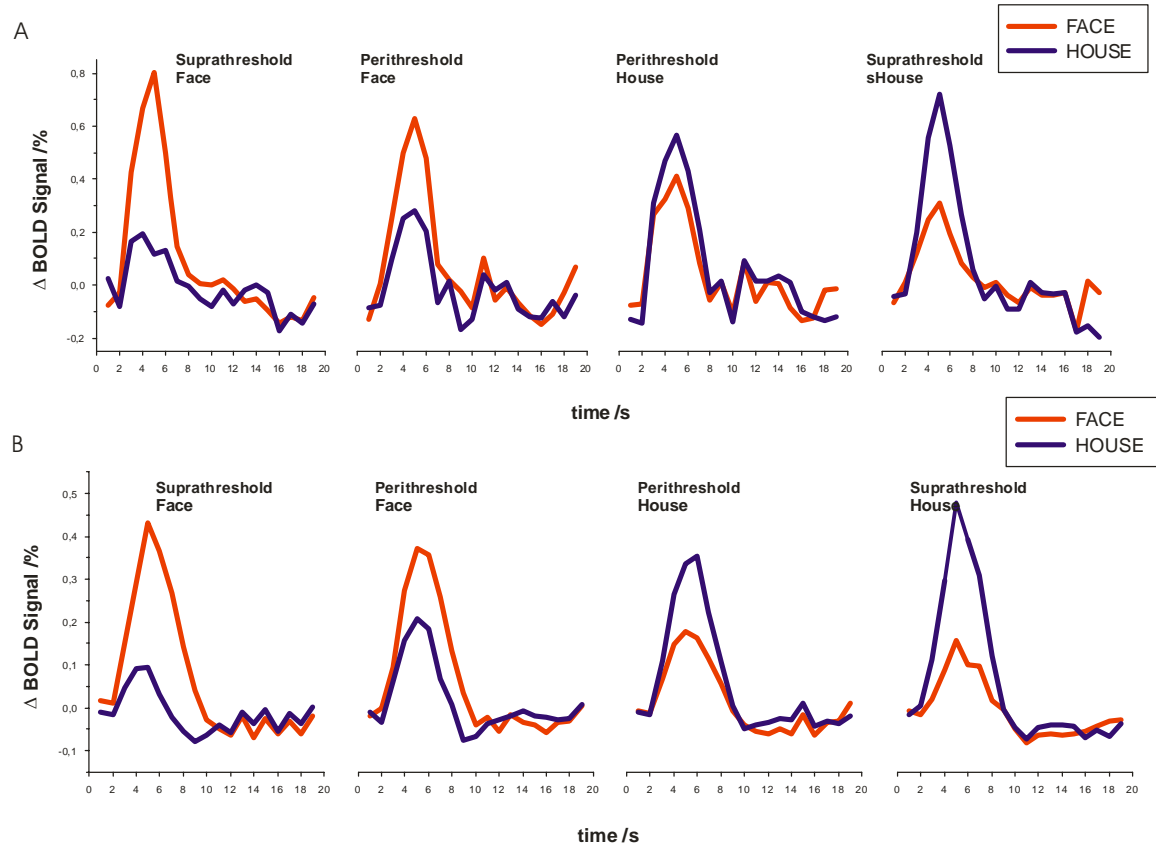

**Figure S1. Time courses of BOLD responses to the four conditions in maximally face-responsive and house-responsive regions, respectively. A)** Time course data from a representative subject. **B)** Group average (n=12).

Figure S2

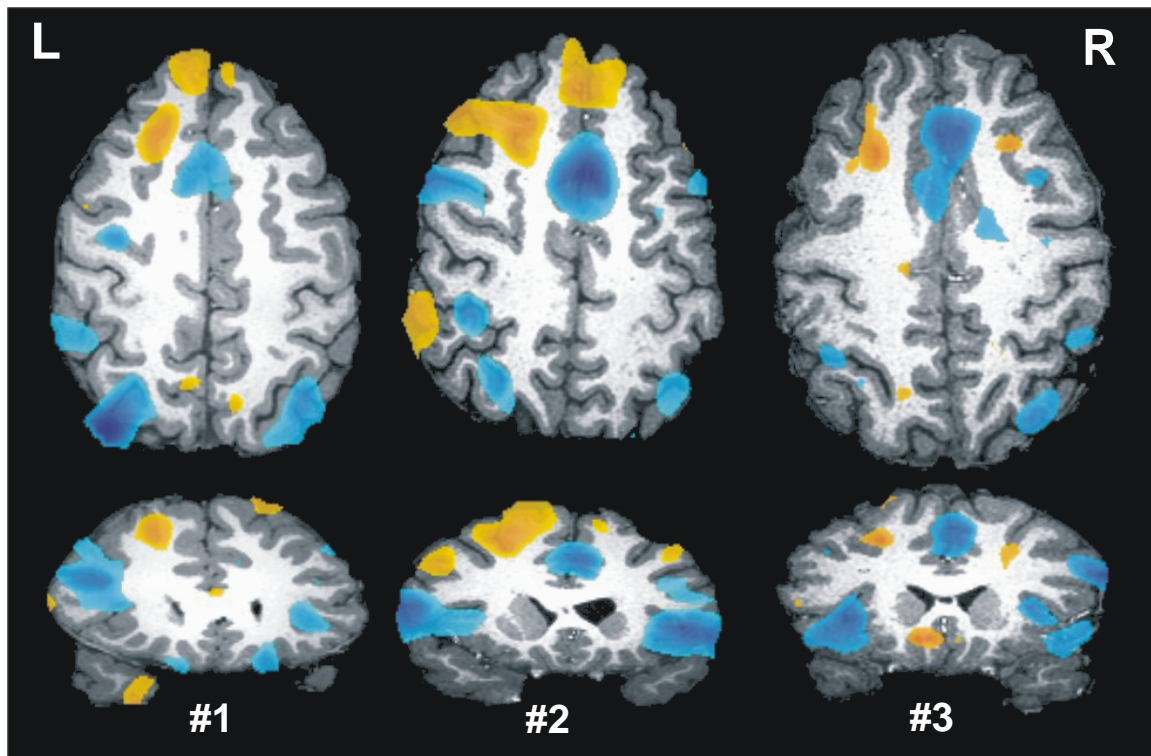

**Figure S2. Statistical maps showing main effect of task difficulty in 3 individual subjects.** Colour scale and slice positions shown here are the same as in Figure 3 of main article (orange: easier [low noise proportion] > harder ([high noise proportion]); blue: harder > easier). Top row: axial slices, bottom row: coronal slices, anatomical reference should be taken from Figure 3 .

Figure S3

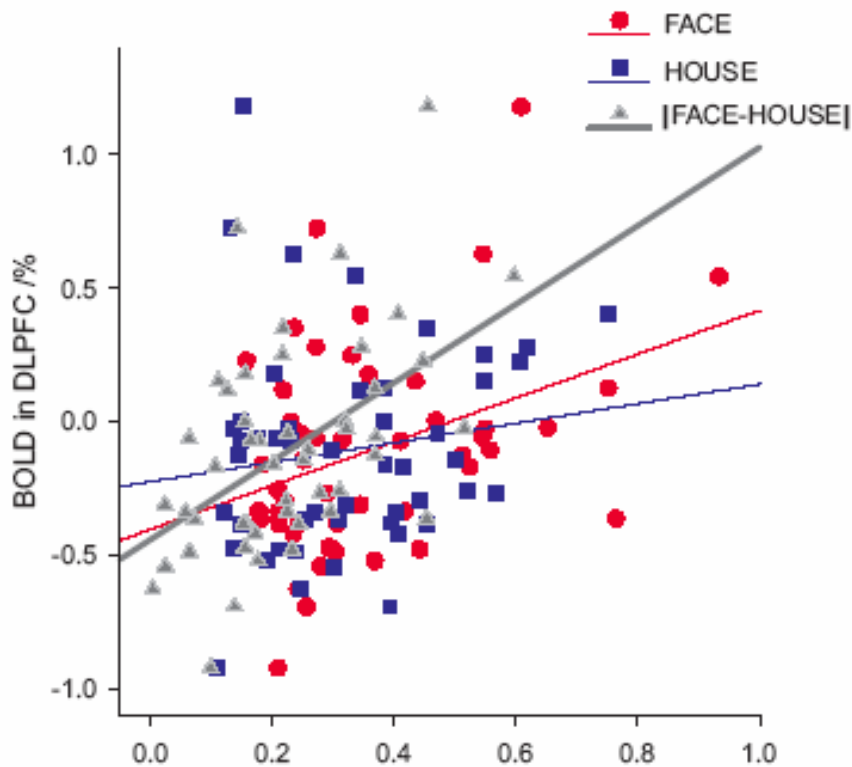

**Figure S3. Correlation between changes in BOLD activity in DLPFC with changes in activity in face- and house-responsive regions (FACE, HOUSE) as well as the difference signal |FACE – HOUSE|.** Points represent BOLD change for each condition (suprathreshold face, perithreshold face, perithreshold house, suprathreshold house) and subject. Correlation with BOLD activity in DLPFC: |FACE-HOUSE|  $r = 0.507$  ( $p < 0.0001$ ), FACE  $r = 0.366$  ( $p = 0.011$ ), HOUSE  $r = 0.146$  ( $p = 0.322$ ). Partial correlation between |FACE-HOUSE| and DLPFC controlling for FACE and HOUSE remained significant ( $r = 0.301$ ,  $p = 0.038$ ). These results indicate that the correlation between changes in activity in DLPFC with the difference signal is better than with the activity from either the face-responsive or house-responsive regions alone (see Supplemental Methods & Data for a detailed description of control analyses).
